# Supplementary material for: Nickel@Siloxene catalytic nanosheets for high-performance CO2 methanation
Source: PubMed Central journal article supplement (PMC6565710; doi:10.1038/s41467-019-10464-x), 2019-06-13
Supplement: 41467_2019_10464_MOESM2_ESM.pdf [file 41467_2019_10464_MOESM2_ESM.pdf]

## **Description of Additional Supplementary Files**

File Name: Supplementary Movie 1

Description: Volume rendering of 3D reconstruction of a particulate of Ni@SiXNS-EtOH
